# Supplementary material for: Low-penetrance alleles predisposing to sporadic colorectal cancers: a French case-controlled genetic association study
Source: BMC Cancer. 2008 Nov 7;8:326. doi: 10.1186/1471-2407-8-326 (PMC2585099; doi:10.1186/1471-2407-8-326)
Supplement: Additional file 4 — Test of the different possible models of genotypic combinations related to a given set of five polymorphisms picked among the 52 polymorphisms analysed in the study. [file 1471-2407-8-326-S4.xls]

## Sheet: Additional file 4
Additional file 4. Test of the different possible models of genotypic combinations related to a given set of five polymorphisms picked among the 52 polymorphisms analysed in the study. The test is illustrated here by the examination of combinations of SNPs PTGS1 c.639C>A, PLA2G2A c.435+230C>T, PPARG c.1431C>T, IL8 c.-352T>A, and MTHFR c.1286A>C. For each model of genotypic combinations, the risk …
Model	Combination of genotypes tested = putative predisposing combination					Combinations of genotypes used as a reference	Population tested	Patients carrying putative predisposing combination	Patients carrying reference combinations	Controls carrying putative predisposing combination	Controls carrying reference combinations	OR	CI 95%	P value	Q value
	PTGS1 c.639C>A	PLA2G2A c.435+230C>T	PPARG c.1431C>T	IL8 c.-352T>A	MTHFR c.1286A>C
1	1 or 2	1 or 2	1 or 2	1 or 2	1 or 2	All other genotypes	whole study population	5	1018	8	1113	0.68	(0.22-2.08)	0.5029	0.7305
	1 or 2	1 or 2	1 or 2	1 or 2	1 or 2	00000	whole study population	5	63	8	95	0.94	(0.29-3.01)	0.9204	0.9561
	1 or 2	1 or 2	1 or 2	1 or 2	1 or 2	All other genotypes	women only	1	391	6	505	0.22	(0.03-1.48)	0.1186	0.6216
	1 or 2	1 or 2	1 or 2	1 or 2	1 or 2	All other genotypes	men only	4	631	2	604	1.91	(0.35-10.1)	0.4465	0.7305
2	1 or 2	1 or 2	1 or 2	1 or 2	0	All other genotypes	whole study population	7	1016	4	1117	1.92	(0.57-6.45)	0.2892	0.6505
	1 or 2	1 or 2	1 or 2	1 or 2	0	00000	whole study population	7	63	4	95	2.64	(0.77-9.02)	0.1219	0.6216
	1 or 2	1 or 2	1 or 2	1 or 2	0	All other genotypes	women only	3	389	1	510	3.93	(0.48-32.1)	0.2014	0.6504
	1 or 2	1 or 2	1 or 2	1 or 2	0	All other genotypes	men only	4	631	3	603	1.27	(0.28-5.69)	0.7512	0.9014
3	1 or 2	0	0	1 or 2	1 or 2	All other genotypes	whole study population	66	957	41	1080	1.82	(1.22-2.69)	0.0030	0.0962
	1 or 2	0	0	1 or 2	1 or 2	00000	whole study population	66	63	41	95	2.43	(1.47-3.99)	0.0005	0.0789
	1 or 2	0	0	1 or 2	1 or 2	All other genotypes	women only	35	357	20	491	2.41	(1.38-4.17)	0.0018	0.0962
	1 or 2	0	0	1 or 2	1 or 2	All other genotypes	men only	31	604	21	585	1.43	(0.81-2.51)	0.2132	0.6504
4	0	0	0	1 or 2	1 or 2	All other genotypes	whole study population	170	853	172	949	1.10	(0.87-1.38)	0.4209	0.7305
	0	0	0	1 or 2	1 or 2	00000	whole study population	170	63	172	95	1.49	(1.01-2.18)	0.0404	0.5091
	0	0	0	1 or 2	1 or 2	All other genotypes	women only	69	323	72	439	1.30	(0.90-1.86)	0.1496	0.6231
	0	0	0	1 or 2	1 or 2	All other genotypes	men only	101	534	100	506	0.96	(0.70-1.29)	0.7757	0.9014
5	0	0	0	0	1 or 2	All other genotypes	whole study population	81	942	81	1040	1.10	(0.80-1.52)	0.5447	0.7746
	0	0	0	0	1 or 2	00000	whole study population	81	63	81	95	1.51	(0.96-2.34)	0.0687	0.5617
	0	0	0	0	1 or 2	All other genotypes	women only	27	365	42	469	0.83	(0.50-1.36)	0.4554	0.7305
	0	0	0	0	1 or 2	All other genotypes	men only	54	581	39	567	1.35	(0.88-2.07)	0.1666	0.6231
6	0	0	0	0	0	All other genotypes	whole study population	63	960	95	1026	0.71	(0.51-0.98)	0.0403	0.5091
	0	0	0	0	0	00000	whole study population	63	63	95	95	1.00		1.0000	0.9660
	0	0	0	0	0	All other genotypes	women only	25	367	43	468	0.74	(0.44-1.23)	0.2502	0.6505
	0	0	0	0	0	All other genotypes	men only	38	597	52	554	0.68	(0.44-1.04)	0.0779	0.5617
Model	Combination of genotypes tested = putative predisposing combination					Combinations of genotypes used as a reference	Population tested	Patients carrying putative predisposing combination	Patients carrying reference combinations	Controls carrying putative predisposing combination	Controls carrying reference combinations	OR	CI 95%	P value	Q value
	PLA2G2A c.435+230C>T	PPARG c.1431C>T	IL8 c.-352T>A	MTHFR c.1286A>C	PTGS1 c.639C>A
7	1 or 2	1 or 2	1 or 2	1 or 2	0	All other genotypes	whole study population	18	1005	12	1109	1.66	(0.79-3.42)	0.1749	0.6231
	1 or 2	1 or 2	1 or 2	1 or 2	0	00000	whole study population	18	63	12	95	2.26	(1.03-4.95)	0.0413	0.5091
	1 or 2	1 or 2	1 or 2	1 or 2	0	All other genotypes	women only	7	385	4	507	2.30	(0.69-7.66)	0.1733	0.6231
	1 or 2	1 or 2	1 or 2	1 or 2	0	All other genotypes	men only	11	624	8	598	1.32	(0.52-3.28)	0.5545	0.7746
8	1 or 2	0	0	1 or 2	1 or 2	All other genotypes	whole study population	7	1016	9	1112	0.85	(0.31-2.29)	0.7500	0.9014
	1 or 2	0	0	1 or 2	1 or 2	00000	whole study population	7	63	9	95	1.17	(0.41-3.30)	0.7632	0.9014
	1 or 2	0	0	1 or 2	1 or 2	All other genotypes	women only	3	389	3	508	1.31	(0.26-6.47)	0.7439	0.9014
	1 or 2	0	0	1 or 2	1 or 2	All other genotypes	men only	4	631	6	600	0.63	(0.17-2.23)	0.4781	0.7305
9	0	0	0	1 or 2	1 or 2	All other genotypes	whole study population	24	999	26	1095	1.01	(0.57-1.77)	0.9674	0.9561
	0	0	0	1 or 2	1 or 2	00000	whole study population	24	63	26	95	1.39	(0.73-2.63)	0.3100	0.6627
	0	0	0	1 or 2	1 or 2	All other genotypes	women only	12	380	11	500	1.44	(0.62-3.27)	0.3904	0.7305
	0	0	0	1 or 2	1 or 2	All other genotypes	men only	12	623	15	591	0.76	(0.35-1.63)	0.4798	0.7305
10	0	0	0	0	1 or 2	All other genotypes	whole study population	21	1002	23	1098	1.00	(0.55-1.81)	0.9986	0.9660
	0	0	0	0	1 or 2	00000	whole study population	21	63	23	95	1.38	(0.70-2.69)	0.3499	0.6926
	0	0	0	0	1 or 2	All other genotypes	women only	5	387	8	503	0.81	(0.26-2.49)	0.7169	0.9014
	0	0	0	0	1 or 2	All other genotypes	men only	16	619	15	591	1.02	(0.49-2.07)	0.9600	0.9561
Model	Combination of genotypes tested = putative predisposing combination					Combinations of genotypes used as a reference	Population tested	Patients carrying putative predisposing combination	Patients carrying reference combinations	Controls carrying putative predisposing combination	Controls carrying reference combinations	OR	CI 95%	P value	Q value
	PPARG c.1431C>T	IL8 c.-352T>A	MTHFR c.1286A>C	PTGS1 c.639C>A	PLA2G2A c.435+230C>T
11	1 or 2	1 or 2	1 or 2	1 or 2	0	All other genotypes	whole study population	14	1009	7	1114	2.21	(0.90-5.36)	0.0806	0.5617
	1 or 2	1 or 2	1 or 2	1 or 2	0	00000	whole study population	14	63	7	95	3.02	(1.19-7.63)	0.0198	0.4538
	1 or 2	1 or 2	1 or 2	1 or 2	0	All other genotypes	women only	9	383	1	510	11.98	(2.35-61.0)	0.0028	0.0962
	1 or 2	1 or 2	1 or 2	1 or 2	0	All other genotypes	men only	5	630	6	600	0.79	(0.24-2.60)	0.7033	0.9014
12	1 or 2	0	0	1 or 2	1 or 2	All other genotypes	whole study population	2	1021	6	1115	0.36	(0.07-1.69)	0.1975	0.6504
	1 or 2	0	0	1 or 2	1 or 2	00000	whole study population	2	63	6	95	0.50	(0.10-2.49)	0.4004	0.7305
	1 or 2	0	0	1 or 2	1 or 2	All other genotypes	women only	2	390	3	508	0.87	(0.14-5.21)	0.8774	0.9502
	1 or 2	0	0	1 or 2	1 or 2	All other genotypes	men only	0	635	3	603	rare		0.0759	0.5617
13	0	0	0	1 or 2	1 or 2	All other genotypes	whole study population	9	1014	6	1115	1.65	(0.59-4.60)	0.3391	0.6883
	0	0	0	1 or 2	1 or 2	00000	whole study population	9	63	6	95	2.26	(0.78-6.51)	0.1307	0.6216
	0	0	0	1 or 2	1 or 2	All other genotypes	women only	3	389	2	509	1.96	(0.33-11.4)	0.4530	0.7305
	0	0	0	1 or 2	1 or 2	All other genotypes	men only	6	629	4	602	1.44	(0.40-5.07)	0.5748	0.7746
14	0	0	0	0	1 or 2	All other genotypes	whole study population	13	1010	22	1099	0.64	(0.32-1.27)	0.2068	0.6504
	0	0	0	0	1 or 2	00000	whole study population	13	63	22	95	0.89	(0.41-1.89)	0.7648	0.9014
	0	0	0	0	1 or 2	All other genotypes	women only	4	388	14	497	0.37	(0.12-1.07)	0.0669	0.5617
	0	0	0	0	1 or 2	All other genotypes	men only	9	626	8	598	1.07	(0.41-2.80)	0.8829	0.9502
Model	Combination of genotypes tested = putative predisposing combination					Combinations of genotypes used as a reference	Population tested	Patients carrying putative predisposing combination	Patients carrying reference combinations	Controls carrying putative predisposing combination	Controls carrying reference combinations	OR	CI 95%	P value	Q value
	IL8 c.-352T>A	MTHFR c.1286A>C	PTGS1 c.639C>A	PLA2G2A c.435+230C>T	PPARG c.1431C>T
15	1 or 2	1 or 2	1 or 2	1 or 2	0	All other genotypes	whole study population	15	1008	17	1104	0.97	(0.48-1.94)	0.9237	0.9561
	1 or 2	1 or 2	1 or 2	1 or 2	0	00000	whole study population	15	63	17	95	1.33	(0.62-2.85)	0.4628	0.7305
	1 or 2	1 or 2	1 or 2	1 or 2	0	All other genotypes	women only	8	384	6	505	1.75	(0.61-5.02)	0.2961	0.6505
	1 or 2	1 or 2	1 or 2	1 or 2	0	All other genotypes	men only	7	628	11	595	0.60	(0.23-1.55)	0.2938	0.6505
16	1 or 2	0	0	1 or 2	1 or 2	All other genotypes	whole study population	9	1014	23	1098	0.42	(0.19-0.89)	0.0254	0.4756
	1 or 2	0	0	1 or 2	1 or 2	00000	whole study population	9	63	23	95	0.59	(0.25-1.35)	0.2116	0.6504
	1 or 2	0	0	1 or 2	1 or 2	All other genotypes	women only	2	390	12	499	0.21	(0.05-0.83)	0.0267	0.4756
	1 or 2	0	0	1 or 2	1 or 2	All other genotypes	men only	7	628	11	595	0.60	(0.23-1.55)	0.2938	0.6505
17	0	0	0	1 or 2	1 or 2	All other genotypes	whole study population	4	1019	7	1114	0.62	(0.18-2.11)	0.4499	0.7305
	0	0	0	1 or 2	1 or 2	00000	whole study population	4	63	7	95	0.86	(0.24-3.06)	0.8180	0.9369
	0	0	0	1 or 2	1 or 2	All other genotypes	women only	1	391	4	507	0.32	(0.04-2.60)	0.2895	0.6505
	0	0	0	1 or 2	1 or 2	All other genotypes	men only	3	632	3	603	0.95	(0.19-4.74)	0.9542	0.9561
18	0	0	0	0	1 or 2	All other genotypes	whole study population	23	1000	24	1097	1.05	(0.58-1.87)	0.8654	0.9502
	0	0	0	0	1 or 2	00000	whole study population	23	63	24	95	1.45	(0.75-2.77)	0.2690	0.6505
	0	0	0	0	1 or 2	All other genotypes	women only	8	384	6	505	1.75	(0.61-5.02)	0.2961	0.6505
	0	0	0	0	1 or 2	All other genotypes	men only	15	620	18	588	0.79	(0.39-1.58)	0.5057	0.7305
Model	Combination of genotypes tested = putative predisposing combination					Combinations of genotypes used as a reference	Population tested	Patients carrying putative predisposing combination	Patients carrying reference combinations	Controls carrying putative predisposing combination	Controls carrying reference combinations	OR	CI 95%	P value	Q value
	MTHFR c.1286A>C	PTGS1 c.639C>A	PLA2G2A c.435+230C>T	PPARG c.1431C>T	IL8 c.-352T>A
19	1 or 2	1 or 2	1 or 2	1 or 2	0	All other genotypes	whole study population	0	1023	3	1118	rare		0.0978	0.6216
	1 or 2	1 or 2	1 or 2	1 or 2	0	00000	whole study population	0	63	3	95	rare		0.1610	0.6231
	1 or 2	1 or 2	1 or 2	1 or 2	0	All other genotypes	women only	0	392	0	511	rare
	1 or 2	1 or 2	1 or 2	1 or 2	0	All other genotypes	men only	0	635	3	603	rare		0.0759	0.5617
20	1 or 2	0	0	1 or 2	1 or 2	All other genotypes	whole study population	43	980	44	1077	1.07	(0.69-1.64)	0.7443	0.9014
	1 or 2	0	0	1 or 2	1 or 2	00000	whole study population	43	63	44	95	1.47	(0.87-2.49)	0.1487	0.6231
	1 or 2	0	0	1 or 2	1 or 2	All other genotypes	women only	16	376	28	483	0.73	(0.39-1.37)	0.3335	0.6883
	1 or 2	0	0	1 or 2	1 or 2	All other genotypes	men only	27	608	16	590	1.64	(0.87-3.05)	0.1207	0.6216
21	0	0	0	1 or 2	1 or 2	All other genotypes	whole study population	38	985	52	1069	0.79	(0.51-1.21)	0.2865	0.6505
	0	0	0	1 or 2	1 or 2	00000	whole study population	38	63	52	95	1.10	(0.65-1.86)	0.7174	0.9014
	0	0	0	1 or 2	1 or 2	All other genotypes	women only	12	380	25	486	0.61	(0.30-1.23)	0.1689	0.6231
	0	0	0	1 or 2	1 or 2	All other genotypes	men only	26	609	27	579	0.92	(0.52-1.58)	0.7533	0.9014
22	0	0	0	0	1 or 2	All other genotypes	whole study population	140	883	154	967	1.00	(0.77-1.27)	0.9718	0.9561
	0	0	0	0	1 or 2	00000	whole study population	140	63	154	95	1.37	(0.92-2.02)	0.1144	0.6216
	0	0	0	0	1 or 2	All other genotypes	women only	49	343	74	437	0.84	(0.57-1.24)	0.3896	0.7305
	0	0	0	0	1 or 2	All other genotypes	men only	91	544	80	526	1.10	(0.79-1.51)	0.5640	0.7746
Model	Combination of genotypes tested = putative predisposing combination					Combinations of genotypes used as a reference	Population tested	Patients carrying putative predisposing combination	Patients carrying reference combinations	Controls carrying putative predisposing combination	Controls carrying reference combinations	OR	CI 95%	P value	Q value
	PPARG c.1431C>T	PLA2G2A c.435+230C>T	IL8 c.-352T>A	MTHFR c.1286A>C	PTGS1 c.639C>A
23	1 or 2	1 or 2	1 or 2	1 or 2	0	All other genotypes	whole study population	18	1005	12	1109	1.66	(0.79-3.42)	0.1749	0.6231
	1 or 2	1 or 2	1 or 2	1 or 2	0	00000	whole study population	18	63	12	95	2.26	(1.03-4.95)	0.0413	0.5091
	1 or 2	1 or 2	1 or 2	1 or 2	0	All other genotypes	women only	7	385	4	507	2.30	(0.69-7.66)	0.1733	0.6231
	1 or 2	1 or 2	1 or 2	1 or 2	0	All other genotypes	men only	11	624	8	598	1.32	(0.52-3.28)	0.5545	0.7746
24	1 or 2	0	0	1 or 2	1 or 2	All other genotypes	whole study population	6	1017	10	1111	0.66	(0.23-1.79)	0.4116	0.7305
	1 or 2	0	0	1 or 2	1 or 2	00000	whole study population	6	63	10	95	0.90	(0.31-2.61)	0.8533	0.9502
	1 or 2	0	0	1 or 2	1 or 2	All other genotypes	women only	0	392	4	507	rare		0.0792	0.5617
	1 or 2	0	0	1 or 2	1 or 2	All other genotypes	men only	6	629	6	600	0.95	(0.30-2.97)	0.9352	0.9561
25	0	0	0	1 or 2	1 or 2	All other genotypes	whole study population	24	999	26	1095	1.01	(0.57-1.77)	0.9674	0.9561
	0	0	0	1 or 2	1 or 2	00000	whole study population	24	63	26	95	1.39	(0.73-2.63)	0.3100	0.6627
	0	0	0	1 or 2	1 or 2	All other genotypes	women only	12	380	11	500	1.44	(0.62-3.27)	0.3904	0.7305
	0	0	0	1 or 2	1 or 2	All other genotypes	men only	12	623	15	591	0.76	(0.35-1.63)	0.4798	0.7305
26	0	0	0	0	1 or 2	All other genotypes	whole study population	21	1002	23	1098	1.00	(0.55-1.81)	0.9986	0.9660
	0	0	0	0	1 or 2	00000	whole study population	21	63	23	95	1.38	(0.70-2.69)	0.3499	0.6926
	0	0	0	0	1 or 2	All other genotypes	women only	5	387	8	503	0.81	(0.26-2.49)	0.7169	0.9014
	0	0	0	0	1 or 2	All other genotypes	men only	16	619	15	591	1.02	(0.49-2.07)	0.9600	0.9561
Model	Combination of genotypes tested = putative predisposing combination					Combinations of genotypes used as a reference	Population tested	Patients carrying putative predisposing combination	Patients carrying reference combinations	Controls carrying putative predisposing combination	Controls carrying reference combinations	OR	CI 95%	P value	Q value
	IL8 c.-352T>A	PLA2G2A c.435+230C>T	MTHFR c.1286A>C	PTGS1 c.639C>A	PPARG c.1431C>T
27	1 or 2	1 or 2	1 or 2	1 or 2	0	All other genotypes	whole study population	15	1008	17	1104	0.97	(0.48-1.94)	0.9237	0.9561
	1 or 2	1 or 2	1 or 2	1 or 2	0	00000	whole study population	15	63	17	95	1.33	(0.62-2.85)	0.4628	0.7305
	1 or 2	1 or 2	1 or 2	1 or 2	0	All other genotypes	women only	8	384	6	505	1.75	(0.61-5.02)	0.2961	0.6505
	1 or 2	1 or 2	1 or 2	1 or 2	0	All other genotypes	men only	7	628	11	595	0.60	(0.23-1.55)	0.2938	0.6505
28	1 or 2	0	0	1 or 2	1 or 2	All other genotypes	whole study population	19	1004	16	1105	1.31	(0.66-2.55)	0.4326	0.7305
	1 or 2	0	0	1 or 2	1 or 2	00000	whole study population	19	63	16	95	1.79	(0.86-3.72)	0.1186	0.6216
	1 or 2	0	0	1 or 2	1 or 2	All other genotypes	women only	9	383	8	503	1.48	(0.56-3.84)	0.4235	0.7305
	1 or 2	0	0	1 or 2	1 or 2	All other genotypes	men only	10	625	8	598	1.20	(0.46-3.04)	0.7076	0.9014
29	0	0	0	1 or 2	1 or 2	All other genotypes	whole study population	5	1018	8	1113	0.68	(0.22-2.08)	0.5029	0.7305
	0	0	0	1 or 2	1 or 2	00000	whole study population	5	63	8	95	0.94	(0.29-3.01)	0.9204	0.9561
	0	0	0	1 or 2	1 or 2	All other genotypes	women only	2	390	3	508	0.87	(0.14-5.21)	0.8774	0.9502
	0	0	0	1 or 2	1 or 2	All other genotypes	men only	3	632	5	601	0.57	(0.13-2.35)	0.4378	0.7305
30	0	0	0	0	1 or 2	All other genotypes	whole study population	23	1000	24	1097	1.05	(0.58-1.87)	0.8654	0.9502
	0	0	0	0	1 or 2	00000	whole study population	23	63	24	95	1.45	(0.75-2.77)	0.2690	0.6505
	0	0	0	0	1 or 2	All other genotypes	women only	8	384	6	505	1.75	(0.61-5.02)	0.2961	0.6505
	0	0	0	0	1 or 2	All other genotypes	men only	15	620	18	588	0.79	(0.39-1.58)	0.5057	0.7305
Model	Combination of genotypes tested = putative predisposing combination					Combinations of genotypes used as a reference	Population tested	Patients carrying putative predisposing combination	Patients carrying reference combinations	Controls carrying putative predisposing combination	Controls carrying reference combinations	OR	CI 95%	P value	Q value
	IL8 c.-352T>A	PPARG c.1431C>T	MTHFR c.1286A>C	PTGS1 c.639C>A	PLA2G2A c.435+230C>T
31	1 or 2	1 or 2	1 or 2	1 or 2	0	All other genotypes	whole study population	14	1009	7	1114	2.21	(0.90-5.36)	0.0806	0.5617
	1 or 2	1 or 2	1 or 2	1 or 2	0	00000	whole study population	14	63	7	95	3.02	(1.19-7.63)	0.0198	0.4538
	1 or 2	1 or 2	1 or 2	1 or 2	0	All other genotypes	women only	9	383	1	510	11.98	(2.35-61.0)	0.0028	0.0962
	1 or 2	1 or 2	1 or 2	1 or 2	0	All other genotypes	men only	5	630	6	600	0.79	(0.24-2.60)	0.7033	0.9014
32	1 or 2	0	0	1 or 2	1 or 2	All other genotypes	whole study population	20	1003	20	1101	1.10	(0.58-2.05)	0.7702	0.9014
	1 or 2	0	0	1 or 2	1 or 2	00000	whole study population	20	63	20	95	1.51	(0.75-3.01)	0.2463	0.6505
	1 or 2	0	0	1 or 2	1 or 2	All other genotypes	women only	10	382	7	504	1.88	(0.72-4.92)	0.1955	0.6504
	1 or 2	0	0	1 or 2	1 or 2	All other genotypes	men only	10	625	13	593	0.73	(0.31-1.67)	0.4564	0.7305
33	0	0	0	1 or 2	1 or 2	All other genotypes	whole study population	9	1014	6	1115	1.65	(0.59-4.60)	0.3391	0.6883
	0	0	0	1 or 2	1 or 2	00000	whole study population	9	63	6	95	2.26	(0.78-6.51)	0.1307	0.6216
	0	0	0	1 or 2	1 or 2	All other genotypes	women only	3	389	2	509	1.96	(0.33-11.4)	0.4530	0.7305
	0	0	0	1 or 2	1 or 2	All other genotypes	men only	6	629	4	602	1.44	(0.40-5.07)	0.5748	0.7746
34	0	0	0	0	1 or 2	All other genotypes	whole study population	13	1010	22	1099	0.64	(0.32-1.27)	0.2068	0.6504
	0	0	0	0	1 or 2	00000	whole study population	13	63	22	95	0.89	(0.41-1.89)	0.7648	0.9014
	0	0	0	0	1 or 2	All other genotypes	women only	4	388	14	497	0.37	(0.12-1.07)	0.0669	0.5617
	0	0	0	0	1 or 2	All other genotypes	men only	9	626	8	598	1.07	(0.41-2.80)	0.8829	0.9502
Model	Combination of genotypes tested = putative predisposing combination					Combinations of genotypes used as a reference	Population tested	Patients carrying putative predisposing combination	Patients carrying reference combinations	Controls carrying putative predisposing combination	Controls carrying reference combinations	OR	CI 95%	P value	Q value
	MTHFR c.1286A>C	PPARG c.1431C>T	PTGS1 c.639C>A	PLA2G2A c.435+230C>T	IL8 c.-352T>A
35	1 or 2	1 or 2	1 or 2	1 or 2	0	All other genotypes	whole study population	0	1023	3	1118	rare		0.0978	0.6216
	1 or 2	1 or 2	1 or 2	1 or 2	0	00000	whole study population	0	63	3	95	rare		0.1610	0.6231
	1 or 2	1 or 2	1 or 2	1 or 2	0	All other genotypes	women only	0	392	0	511	rare
	1 or 2	1 or 2	1 or 2	1 or 2	0	All other genotypes	men only	0	635	3	603	rare		0.0759	0.5617
36	1 or 2	0	0	1 or 2	1 or 2	All other genotypes	whole study population	42	981	58	1063	0.78	(0.52-1.17)	0.2413	0.6505
	1 or 2	0	0	1 or 2	1 or 2	00000	whole study population	42	63	58	95	1.09	(0.65-1.81)	0.7348	0.9014
	1 or 2	0	0	1 or 2	1 or 2	All other genotypes	women only	16	376	23	488	0.90	(0.47-1.73)	0.7587	0.9014
	1 or 2	0	0	1 or 2	1 or 2	All other genotypes	men only	26	609	35	571	0.70	(0.41-1.16)	0.1709	0.6231
37	0	0	0	1 or 2	1 or 2	All other genotypes	whole study population	55	968	57	1064	1.06	(0.72-1.55)	0.7618	0.9014
	0	0	0	1 or 2	1 or 2	00000	whole study population	55	63	57	95	1.46	(0.89-2.36)	0.1318	0.6216
	0	0	0	1 or 2	1 or 2	All other genotypes	women only	19	373	30	481	0.82	(0.45-1.47)	0.5008	0.7305
	0	0	0	1 or 2	1 or 2	All other genotypes	men only	36	599	27	579	1.29	(0.77-2.14)	0.3302	0.6883
38	0	0	0	0	1 or 2	All other genotypes	whole study population	140	883	154	967	1.00	(0.77-1.27)	0.9718	0.9561
	0	0	0	0	1 or 2	00000	whole study population	140	63	154	95	1.37	(0.92-2.02)	0.1144	0.6216
	0	0	0	0	1 or 2	All other genotypes	women only	49	343	74	437	0.84	(0.57-1.24)	0.3896	0.7305
	0	0	0	0	1 or 2	All other genotypes	men only	91	544	80	526	1.10	(0.79-1.51)	0.5640	0.7746
Model	Combination of genotypes tested = putative predisposing combination					Combinations of genotypes used as a reference	Population tested	Patients carrying putative predisposing combination	Patients carrying reference combinations	Controls carrying putative predisposing combination	Controls carrying reference combinations	OR	CI 95%	P value	Q value
	MTHFR c.1286A>C	IL8 c.-352T>A	PTGS1 c.639C>A	PLA2G2A c.435+230C>T	PPARG c.1431C>T
39	1 or 2	1 or 2	1 or 2	1 or 2	0	All other genotypes	whole study population	15	1008	17	1104	0.97	(0.48-1.94)	0.9237	0.9561
	1 or 2	1 or 2	1 or 2	1 or 2	0	00000	whole study population	15	63	17	95	1.33	(0.62-2.85)	0.4628	0.7305
	1 or 2	1 or 2	1 or 2	1 or 2	0	All other genotypes	women only	8	384	6	505	1.75	(0.61-5.02)	0.2961	0.6505
	1 or 2	1 or 2	1 or 2	1 or 2	0	All other genotypes	men only	7	628	11	595	0.60	(0.23-1.55)	0.2938	0.6505
40	1 or 2	0	0	1 or 2	1 or 2	All other genotypes	whole study population	6	1017	6	1115	1.10	(0.35-3.40)	0.8737	0.9502
	1 or 2	0	0	1 or 2	1 or 2	00000	whole study population	6	63	6	95	1.51	(0.46-4.85)	0.4910	0.7305
	1 or 2	0	0	1 or 2	1 or 2	All other genotypes	women only	0	392	2	509	rare		0.2150	0.6504
	1 or 2	0	0	1 or 2	1 or 2	All other genotypes	men only	6	629	4	602	1.44	(0.40-5.07)	0.5748	0.7746
41	0	0	0	1 or 2	1 or 2	All other genotypes	whole study population	4	1019	7	1114	0.62	(0.18-2.11)	0.4499	0.7305
	0	0	0	1 or 2	1 or 2	00000	whole study population	4	63	7	95	0.86	(0.24-3.06)	0.8180	0.9369
	0	0	0	1 or 2	1 or 2	All other genotypes	women only	1	391	4	507	0.32	(0.04-2.60)	0.2895	0.6505
	0	0	0	1 or 2	1 or 2	All other genotypes	men only	3	632	3	603	0.95	(0.19-4.74)	0.9542	0.9561
42	0	0	0	0	1 or 2	All other genotypes	whole study population	23	1000	24	1097	1.05	(0.58-1.87)	0.8654	0.9502
	0	0	0	0	1 or 2	00000	whole study population	23	63	24	95	1.45	(0.75-2.77)	0.2690	0.6505
	0	0	0	0	1 or 2	All other genotypes	women only	8	384	6	505	1.75	(0.61-5.02)	0.2961	0.6505
	0	0	0	0	1 or 2	All other genotypes	men only	15	620	18	588	0.79	(0.39-1.58)	0.5057	0.7305
